# Supplementary material for: Impact of temperature on the role of Criegee intermediates and peroxy radicals in dimer formation from β -pinene ozonolysis
Source: Copernicus journal article supplement (doi:10.5194/acp-24-167-2024), 2024-01-08
Supplement: Supplementary file 1 [file acp-24-167-2024-supplement.pdf]

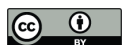

*Supplement of*

## **Impact of temperature on the role of Criegee intermediates and peroxy radicals in dimer formation from $\beta$ -pinene ozonolysis**

**Yiwei Gong et al.**

*Correspondence to:* Yiwei Gong (yiwei.gong@kit.edu) and Harald Saathoff (harald.saathoff@kit.edu)

The copyright of individual parts of the supplement might differ from the article licence.

### **Calibration of FIGAERO-CIMS with pinic acid**

- 15 Pinic acid, as the most abundant product formed during the reaction, was utilized to characterize the sensitivity of CIMS. Pinic acid ( $C_9H_{14}O_4$ , 92%, Chemspace) was dissolved into methanol to  $1.77 \times 10^{-4}$ ,  $1.77 \times 10^{-5}$ , and  $1.77 \times 10^{-6}$  g mL<sup>-1</sup> as standard solutions. Different volumes of the standard solutions were deposited on a PTFE filter using a syringe. The filter was heated by FIGAREO-CIMS in ultra-high-purity nitrogen following a thermal desorption procedure. The results are shown in Fig. S2.

20

### **SOA density calculation**

Effective density of aerosol was derived from comparing the mass distribution versus vacuum aerodynamic diameter from  
25 AMS, and the size distribution versus mobility diameter from SMPS. Considering that these newly formed particles during  
reaction were usually smaller than 70 nm, which could not be measured by AMS, the effective density calculated here relied  
on the organics that partitioned to the inorganic seed particles.

**Table S1. SOA yields and reaction conditions in  $\beta$ -pinene ozonolysis studies.**

| Temperature (K) | RH (%) | OH scavenger | Aerosol mass ( $\mu\text{g}\cdot\text{m}^{-3}$ ) | SOA yield (%) | Reference                 |
|-----------------|--------|--------------|--------------------------------------------------|---------------|---------------------------|
| 263–303         | <0.03  | none         | 2–284                                            | 3–39          | von Hessberg et al., 2009 |
| 300             | 22     | none         | $156 \pm 3$                                      | $18 \pm 1$    | Xu et al., 2021           |
| 293             | 6.3    | cyclohexane  | $174 \pm 3$                                      | $17 \pm 1$    | Lee et al., 2006          |
| 306–307         | –      | 2-butanol    | 11–19                                            | 4–8           | Yu et al., 1999           |
| 248–298         | <0.01  | CO           | 18–25                                            | 11–19         | This work                 |

Table S2.  $T_{\max}$  (°C) of all the monomers and dimers at different temperatures.

|          | 298 K | 273 K | 248 K |           | 298 K | 273 K | 248 K |           | 298 K | 273 K | 248 K |
|----------|-------|-------|-------|-----------|-------|-------|-------|-----------|-------|-------|-------|
| C8H8O3   | 75.5  | 54    | 66.3  | C16H22O7  | 115   | 88.3  | 83    | C18H26O9  | 115   | 102.5 | 95.4  |
| C8H8O4   | 115   | 68.1  | 50.5  | C16H22O8  | 116.7 | 115   | 83    | C18H26O10 | 116.7 | 99    | 97.2  |
| C8H8O5   | 115   | 48.8  | 125.3 | C16H22O9  | 120   | 104.3 | 97.2  | C18H26O11 | 107.8 | 102.5 | 102.5 |
| C8H8O6   | 81.1  | 57.4  | 55.8  | C16H22O10 | 118.4 | 107.8 | 107.8 | C18H28O4  | 109.7 | 109.7 | 61    |
| C8H10O3  | 120   | 115   | 64.6  | C16H24O4  | 113.2 | 107.8 | 100.8 | C18H28O6  | 91.8  | 93.6  | 88.3  |
| C8H10O4  | 62.8  | 43.9  | 43.9  | C16H24O5  | 115   | 107.8 | 77.2  | C18H28O7  | 118.4 | 62.8  | 61    |
| C8H10O5  | 61    | 43.9  | 42.4  | C16H24O6  | 84.7  | 75.5  | 75.5  | C18H28O8  | 121.9 | 113.2 | 106   |
| C8H10O6  | 83    | 59.2  | 42.4  | C16H24O7  | 116.7 | 93.6  | 100.8 | C18H28O9  | 113.2 | 102.5 | 93.6  |
| C8H10O8  | 99    | 50.5  | 99    | C16H24O8  | 111.5 | 107.8 | 104.3 | C18H28O11 | 125.3 | 116.7 | 115   |
| C8H10O9  | 102.5 | 50.5  | 50.5  | C16H24O9  | 115   | 111.5 | 102.5 | C18H30O4  | 84.7  | 91.8  | 57.4  |
| C8H10O10 | 75.5  | 118.4 | 142.8 | C16H24O10 | 107.8 | 102.5 | 77.2  | C18H30O5  | 111.5 | 109.7 | 84.7  |
| C8H12O3  | 75.5  | 71.8  | 79.1  | C16H24O11 | 99    | 95.4  | 69.8  | C18H30O6  | 104.3 | 109.7 | 88.3  |
| C8H12O4  | 111.5 | 111.5 | 109.7 | C16H24O12 | 109.7 | 164.4 | 95.4  | C18H30O7  | 106   | 109.7 | 106   |
| C8H12O5  | 69.8  | 36.5  | 54    | C16H26O4  | 106   | 73.6  | 81.1  | C18H30O8  | 116.7 | 111.5 | 109.7 |
| C8H12O6  | 84.7  | 54    | 54    | C16H26O5  | 115   | 109.7 | 71.8  | C18H30O9  | 107.8 | 100.8 | 95.4  |
| C8H12O7  | 81.1  | 57.4  | 48.8  | C16H26O6  | 86.6  | 83    | 73.6  | C18H30O11 | 121.9 | 120   | 115   |
| C8H12O8  | 71.8  | 95.4  | 55.8  | C16H26O7  | 106   | 107.8 | 99    | C18H30O12 | 118.4 | 121.9 | 116.7 |
| C8H14O3  | 102.5 | 102.5 | 73.6  | C16H26O8  | 113.2 | 107.8 | 102.5 | C18H32O8  | 115   | 109.7 | 95.4  |
| C8H14O4  | 79.1  | 33.7  | 36.5  | C16H26O9  | 106   | 99    | 93.6  | C18H32O9  | 109.7 | 115   | 100.8 |
| C8H14O5  | 71.8  | 62.8  | 54    | C16H26O10 | 113.2 | 102.5 | 95.4  | C18H32O10 | 116.7 | 102.5 | 83    |
| C8H14O6  | 75.5  | 59.2  | 57.4  | C16H26O11 | 116.7 | 111.5 | 95.4  | C18H32O11 | 121.9 | 116.7 | 109.7 |
| C8H14O7  | 73.6  | 118.4 | 59.2  | C16H26O12 | 120   | 104.3 | 180.5 | C18H32O12 | 118.4 | 116.7 | 109.7 |
| C8H14O8  | 118.4 | 115   | 104.3 | C16H28O4  | 71.8  | 104.3 | 84.7  | C18H34O4  | 104.3 | 99    | 77.2  |
| C8H16O3  | 73.6  | 73.6  | 66.3  | C16H28O5  | 100.8 | 71.8  | 77.2  | C18H34O6  | 111.5 | 109.7 | 106   |
| C8H16O4  | 93.6  | 41    | 55.8  | C16H28O6  | 109.7 | 111.5 | 106   | C18H34O9  | 111.5 | 113.2 | 118.4 |
| C8H16O5  | 75.5  | 59.2  | 52.3  | C16H28O7  | 106   | 113.2 | 95.4  | C18H34O10 | 115   | 107.8 | 95.4  |
| C8H16O6  | 66.3  | 69.8  | 195.3 | C16H28O8  | 107.8 | 102.5 | 100.8 | C18H34O11 | 113.2 | 113.2 | 99    |
| C8H16O7  | 116.7 | 73.6  | 68.1  | C16H28O11 | 118.4 | 106   | 102.5 | C18H36O9  | 113.2 | 111.5 | 102.5 |
| C9H8O4   | 54    | 200.4 | 123.7 | C16H30O4  | 90    | 109.7 | 62.8  | C19H24O7  | 118.4 | 115   | 100.8 |
| C9H8O5   | 116.7 | 50.5  | 86.6  | C16H30O5  | 116.7 | 77.2  | 99    | C19H24O8  | 116.7 | 118.4 | 170.9 |
| C9H8O6   | 115   | 91.8  | 55.8  | C16H30O8  | 104.3 | 111.5 | 93.6  | C19H24O10 | 115   | 106   | 48.8  |
| C9H8O7   | 118.4 | 113.2 | 121.9 | C16H30O10 | 116.7 | 116.7 | 91.8  | C19H24O11 | 120   | 115   | 106   |
| C9H10O4  | 125.3 | 50.5  | 200   | C16H30O12 | 120   | 111.5 | 111.5 | C19H26O5  | 104.3 | 99    | 95.4  |
| C9H10O5  | 144.4 | 151.1 | 99    | C16H32O7  | 84.7  | 64.6  | 57.4  | C19H26O8  | 113.2 | 115   | 77.2  |
| C9H10O6  | 100.8 | 57.4  | 71.8  | C17H22O5  | 106   | 81.1  | 100.8 | C19H26O9  | 116.7 | 95.4  | 109.7 |
| C9H10O7  | 77.2  | 77.2  | 55.8  | C17H22O6  | 73.6  | 77.2  | 86.6  | C19H26O11 | 115   | 100.8 | 86.6  |
| C9H10O8  | 79.1  | 59.2  | 54    | C17H22O7  | 118.4 | 93.6  | 99    | C19H28O4  | 106   | 106   | 62.8  |
| C9H10O9  | 81.1  | 73.6  | 102.5 | C17H22O8  | 111.5 | 99    | 52.3  | C19H28O6  | 97.2  | 95.4  | 88.3  |
| C9H10O10 | 93.6  | 107.8 | 179.1 | C17H22O9  | 109.7 | 102.5 | 102.5 | C19H28O7  | 116.7 | 102.5 | 79.1  |
| C9H12O3  | 115   | 68.1  | 61    | C17H24O4  | 102.5 | 97.2  | 69.8  | C19H28O8  | 102.5 | 100.8 | 91.8  |
| C9H12O4  | 118.4 | 100.8 | 62.8  | C17H24O5  | 113.2 | 111.5 | 71.8  | C19H28O9  | 115   | 109.7 | 88.3  |
| C9H12O5  | 79.1  | 79.1  | 55.8  | C17H24O6  | 113.2 | 111.5 | 59.2  | C19H28O10 | 106   | 91.8  | 109.7 |
| C9H12O6  | 93.6  | 91.8  | 77.2  | C17H24O7  | 115   | 107.8 | 107.8 | C19H30O4  | 102.5 | 77.2  | 62.8  |
| C9H12O7  | 81.1  | 57.4  | 55.8  | C17H24O8  | 116.7 | 59.2  | 55.8  | C19H30O5  | 111.5 | 69.8  | 69.8  |
| C9H12O8  | 95.4  | 73.6  | 73.6  | C17H24O9  | 116.7 | 107.8 | 104.3 | C19H30O6  | 93.6  | 66.3  | 75.5  |
| C9H12O9  | 104.3 | 125.3 | 125.3 | C17H24O10 | 113.2 | 102.5 | 84.7  | C19H30O7  | 88.3  | 88.3  | 84.7  |

|           |       |       |       |           |       |       |       |           |       |       |       |
|-----------|-------|-------|-------|-----------|-------|-------|-------|-----------|-------|-------|-------|
| C9H14O3   | 83    | 99    | 61    | C17H24O11 | 118.4 | 100.8 | 199.8 | C19H30O8  | 95.4  | 79.1  | 79.1  |
| C9H14O4   | 111.5 | 43.9  | 62.8  | C17H26O4  | 81.1  | 84.7  | 68.1  | C19H30O9  | 100.8 | 100.8 | 88.3  |
| C9H14O5   | 75.5  | 64.6  | 50.5  | C17H26O5  | 90    | 88.3  | 71.8  | C19H30O10 | 111.5 | 106   | 115   |
| C9H14O6   | 79.1  | 57.4  | 52.3  | C17H26O6  | 86.6  | 91.8  | 88.3  | C19H30O11 | 123.7 | 120   | 100.8 |
| C9H14O7   | 71.8  | 54    | 54    | C17H26O7  | 113.2 | 111.5 | 86.6  | C19H32O4  | 99    | 99    | 62.8  |
| C9H14O8   | 83    | 57.4  | 54    | C17H26O8  | 107.8 | 107.8 | 104.3 | C19H32O5  | 97.2  | 90    | 59.2  |
| C9H14O10  | 75.5  | 197   | 194.7 | C17H26O9  | 118.4 | 113.2 | 106   | C19H32O6  | 113.2 | 66.3  | 57.4  |
| C9H16O3   | 109.7 | 107.8 | 106   | C17H26O10 | 107.8 | 99    | 99    | C19H32O7  | 113.2 | 107.8 | 102.5 |
| C9H16O4   | 26.5  | 26.5  | 26.5  | C17H26O11 | 107.8 | 106   | 106   | C19H32O8  | 106   | 102.5 | 64.6  |
| C9H16O5   | 99    | 59.2  | 47.3  | C17H28O4  | 109.7 | 79.1  | 75.5  | C19H32O12 | 115   | 113.2 | 115   |
| C9H16O6   | 68.1  | 61    | 47.3  | C17H28O5  | 84.7  | 75.5  | 75.5  | C19H34O8  | 109.7 | 107.8 | 95.4  |
| C9H16O7   | 83    | 81.1  | 61    | C17H28O6  | 106   | 100.8 | 81.1  | C19H34O10 | 118.4 | 116.7 | 99    |
| C9H18O3   | 81.1  | 75.5  | 64.6  | C17H28O7  | 107.8 | 107.8 | 104.3 | C19H34O12 | 120   | 109.7 | 118.4 |
| C10H10O5  | 116.7 | 120   | 59.2  | C17H28O8  | 115   | 109.7 | 109.7 | C19H36O4  | 93.6  | 111.5 | 106   |
| C10H10O6  | 116.7 | 93.6  | 50.5  | C17H28O9  | 100.8 | 100.8 | 64.6  | C19H36O7  | 102.5 | 102.5 | 200.1 |
| C10H10O7  | 120   | 52.3  | 41    | C17H28O10 | 118.4 | 132.4 | 99    | C19H36O8  | 116.7 | 116.7 | 95.4  |
| C10H12O4  | 118.4 | 109.7 | 81.1  | C17H28O11 | 121.9 | 118.4 | 100.8 | C19H36O9  | 118.4 | 95.4  | 99    |
| C10H12O5  | 109.7 | 113.2 | 199.8 | C17H28O12 | 113.2 | 102.5 | 104.3 | C19H36O10 | 115   | 111.5 | 100.8 |
| C10H12O6  | 77.2  | 62.8  | 91.8  | C17H30O4  | 97.2  | 111.5 | 68.1  | C19H36O11 | 111.5 | 113.2 | 102.5 |
| C10H12O7  | 79.1  | 100.8 | 61    | C17H30O5  | 88.3  | 77.2  | 69.8  | C19H36O12 | 120   | 115   | 88.3  |
| C10H12O8  | 81.1  | 93.6  | 81.1  | C17H30O8  | 106   | 109.7 | 102.5 | C19H38O10 | 115   | 104.3 | 107.8 |
| C10H12O9  | 115   | 66.3  | 151.1 | C17H30O9  | 111.5 | 111.5 | 100.8 | C20H22O10 | 127.2 | 123.7 | 195.8 |
| C10H14O3  | 95.4  | 69.8  | 64.6  | C17H30O10 | 116.7 | 115   | 106   | C20H26O7  | 111.5 | 106   | 84.7  |
| C10H14O4  | 154.6 | 99    | 106   | C17H30O12 | 121.9 | 111.5 | 125.3 | C20H28O6  | 115   | 100.8 | 199.8 |
| C10H14O5  | 93.6  | 77.2  | 64.6  | C17H32O4  | 86.6  | 81.1  | 81.1  | C20H28O7  | 109.7 | 109.7 | 106   |
| C10H14O6  | 75.5  | 61    | 61    | C17H32O5  | 102.5 | 113.2 | 95.4  | C20H30O6  | 104.3 | 99    | 90    |
| C10H14O7  | 86.6  | 52.3  | 61    | C17H32O6  | 116.7 | 99    | 97.2  | C20H30O8  | 91.8  | 86.6  | 102.5 |
| C10H14O8  | 83    | 84.7  | 42.4  | C17H32O7  | 113.2 | 111.5 | 104.3 | C20H30O10 | 116.7 | 107.8 | 90    |
| C10H14O9  | 71.8  | 62.8  | 75.5  | C17H32O9  | 120   | 100.8 | 91.8  | C20H30O11 | 120   | 104.3 | 102.5 |
| C10H14O10 | 75.5  | 156.3 | 41    | C17H32O10 | 102.5 | 115   | 106   | C20H32O5  | 91.8  | 100.8 | 79.1  |
| C10H16O3  | 109.7 | 116.7 | 57.4  | C17H32O11 | 107.8 | 100.8 | 104.3 | C20H32O6  | 88.3  | 93.6  | 64.6  |
| C10H16O4  | 84.7  | 68.1  | 62.8  | C17H32O12 | 116.7 | 106   | 88.3  | C20H32O7  | 104.3 | 102.5 | 79.1  |
| C10H16O5  | 97.2  | 62.8  | 68.1  | C17H34O5  | 107.8 | 113.2 | 73.6  | C20H32O8  | 107.8 | 100.8 | 97.2  |
| C10H16O6  | 71.8  | 59.2  | 61    | C17H34O9  | 107.8 | 107.8 | 100.8 | C20H32O9  | 109.7 | 107.8 | 90    |
| C10H16O7  | 84.7  | 68.1  | 57.4  | C17H34O11 | 106   | 111.5 | 100.8 | C20H32O10 | 116.7 | 109.7 | 115   |
| C10H16O8  | 84.7  | 73.6  | 99    | C18H22O9  | 113.2 | 109.7 | 111.5 | C20H32O11 | 111.5 | 106   | 116.7 |
| C10H16O10 | 118.4 | 115   | 121.9 | C18H24O7  | 111.5 | 93.6  | 91.8  | C20H34O6  | 86.6  | 97.2  | 81.1  |
| C10H18O3  | 88.3  | 107.8 | 107.8 | C18H24O8  | 120   | 107.8 | 88.3  | C20H34O8  | 99    | 86.6  | 104.3 |
| C10H18O4  | 90    | 68.1  | 41    | C18H24O9  | 121.9 | 102.5 | 99    | C20H34O9  | 113.2 | 107.8 | 93.6  |
| C10H18O5  | 90    | 41    | 64.6  | C18H26O4  | 90    | 83    | 71.8  | C20H34O10 | 111.5 | 121.9 | 102.5 |
| C10H18O6  | 59.2  | 61    | 59.2  | C18H26O5  | 107.8 | 68.1  | 66.3  | C20H38O9  | 113.2 | 109.7 | 83    |
| C10H18O7  | 68.1  | 61    | 59.2  | C18H26O6  | 106   | 100.8 | 55.8  | C20H40O9  | 109.7 | 113.2 | 104.3 |
| C10H18O8  | 109.7 | 97.2  | 71.8  | C18H26O7  | 115   | 93.6  | 77.2  | C20H40O11 | 118.4 | 116.7 | 97.2  |
| C16H22O5  | 102.5 | 88.3  | 75.5  | C18H26O8  | 118.4 | 93.6  | 81.1  |           |       |       |       |

40 **Table S3. The molar yields of HCHO and nopinone in  $\beta$ -pinene ozonolysis studies.**

| Temperature (K) | OH scavenger | RH (%) | HCHO            | Nopinone        | Reference                 |
|-----------------|--------------|--------|-----------------|-----------------|---------------------------|
| 296 $\pm$ 2     | cyclohexane  | dry    | 0.65 $\pm$ 0.04 | 0.16 $\pm$ 0.04 | Winterhalter et al., 2000 |
| 293             | cyclohexane  | 6.3    | 0.65 $\pm$ 0.06 | 0.17 $\pm$ 0.02 | Lee et al., 2006          |
| 295 $\pm$ 4     | cyclohexane  | dry    | –               | 0.16 $\pm$ 0.03 | Ma and Marston, 2008      |
| 306–307         | 2-butanol    | –      | –               | 0.16–0.17       | Yu et al., 1999           |
| 248–298         | CO           | <0.01  | 0.63 $\pm$ 0.06 | 0.16 $\pm$ 0.02 | This study                |

**Table S4. Updates to the formation of  $\beta$ -pinene-derived Criegee intermediates suggested for MCM v3.3.1.**

| No. | Modified reaction                                        | Branching ratio in MCM | Updated branching ratio | Reference                                                                   |
|-----|----------------------------------------------------------|------------------------|-------------------------|-----------------------------------------------------------------------------|
| 1   | BPINENE + O <sub>3</sub> →NOPINONE + CH <sub>2</sub> OOF | 0.40                   | 0.20                    | Ma and Marston, 2008;<br>Nguyen et al., 2009;<br>This work                  |
| 2   | BPINENE + O <sub>3</sub> →NOPINOOA + HCHO                | 0.60                   | 0.80                    | Ma and Marston, 2008;<br>Nguyen et al., 2009;<br>This work                  |
| 3   | CH <sub>2</sub> OOF→CH <sub>2</sub> O                    | 0.37                   | 0.50                    | Ahrens et al., 2014;<br>Winterhalter et al., 2000;<br>Zhang and Zhang, 2005 |
| 4   | CH <sub>2</sub> OOF→HO <sub>2</sub> +CO+OH               | 0.13                   | 0.30                    | Atkinson et al., 1992;<br>Nguyen et al., 2009                               |
| 5   | CH <sub>2</sub> OOF→CO                                   | 0.50                   | 0.20                    | This work                                                                   |
| 6   | NOPINOOA→NOPINOO                                         | 0.17                   | 0.40                    | Ahrens et al., 2014;<br>Winterhalter et al., 2000;<br>Zhang and Zhang, 2005 |
| 7   | NOPINOOA→NOPINDO <sub>2</sub> + OH                       | 0.50                   | 0.30                    | Atkinson et al., 1992;<br>Nguyen et al., 2009                               |
| 8   | NOPINOOA→C <sub>8</sub> BC                               | 0.33                   | 0.30                    | This work                                                                   |

45



## References

- Ahrens, J., Carlsson, P. T. M., Hertl, N., Olzmann, M., Pfeifle, M., Wolf, J. L., and Zeuch, T.: Infrared Detection of Criegee Intermediates Formed during the Ozonolysis of  $\beta$ -Pinene and Their Reactivity towards Sulfur Dioxide, *Angew. Chem. Int. Ed.*, 53, 715–719, doi: 10.1002/anie.201307327, 2014.
- Atkinson, R., Aschmann, S. M., Arey, J., and Shorees, B.: Formation of OH radicals in the gas phase reactions of O<sub>3</sub> with a series of terpenes, *J. Geophys. Res.*, 97, 6065–6073, doi: 10.1029/92JD00062, 1992.
- Lee, A., Goldstein, A. H., Keywood, M. D., Gao, S., Varutbangkul, V., Bahreini, R., Ng, N. L., Flagan, R. C., and Seinfeld, J. H., Gas-phase products and secondary aerosol yields from the ozonolysis of ten different terpenes, *J. Geophys. Res. Atmos.*, 111, D07302, doi: 10.1029/2005JD006437, 2006.
- Ma, Y. and Marston, G.: Multifunctional acid formation from the gas-phase ozonolysis of  $\beta$ -pinene, *Phys. Chem. Chem. Phys.*, 10, 6115–6126, doi: 10.1039/b807863g, 2008.
- Nguyen, T., Peeters, J., and Vereecken, L.: Theoretical study of the gas-phase ozonolysis of  $\beta$ -pinene (C<sub>10</sub>H<sub>16</sub>), *Phys. Chem. Chem. Phys.*, 11, 5643–5656, doi: 10.1039/b822984h, 2009.
- von Hessberg, C., von Hessberg, P., Pöschl, U., Bilde, M., Nielsen, O. J., and Moortgat, G. K.: Temperature and humidity dependence of secondary organic aerosol yield from the ozonolysis of  $\beta$ -pinene, *Atmos. Chem. Phys.*, 9, 3583–3599, doi: 10.5194/acp-9-3583-2009, 2009.
- Winterhalter, R., Neeb, P., Grossmann, D., Kolloff, A., Horie, O., and Moortgat, G.: Products and Mechanism of the Gas Phase Reaction of Ozone with  $\beta$ -Pinene, *J. Atmos. Chem.*, 35, 165–197, doi: 10.1023/A:1006257800929, 2000.
- Xu, L., Yang, Z. M., Tsona, N. T., Wang, X. K., George, C., and Du, L.: Anthropogenic–biogenic interactions at night: Enhanced formation of secondary aerosols and particulate nitrogen- And sulfur-containing organics from  $\beta$ -pinene oxidation, *Environ. Sci. Technol.*, 55, 7794–7807, doi: 10.1021/acs.est.0c07879, 2021.
- Yu, J., Cocker, D. R., Griffin, R. J., Flagan, R. C., and Seinfeld, J. H.: Gas-Phase ozone oxidation of monoterpenes: gaseous and particulate products, *J. Atmos. Chem.*, 34, 207–258, doi: 10.1023/A:100625493058, 1999.
- Zhang, D. and Zhang, R. Y.: Ozonolysis of  $\alpha$ -pinene and  $\beta$ -pinene: Kinetics and mechanism, *J. Chem. Phys.*, 122, 114308, doi: 10.1063/1.1862616, 2005.

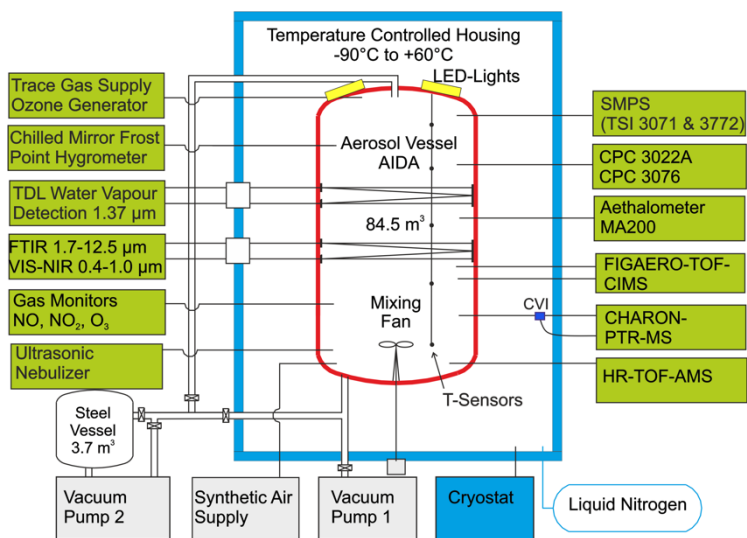

Figure S1. Schematic of the AIDA simulation chamber with the typical instrumentation.

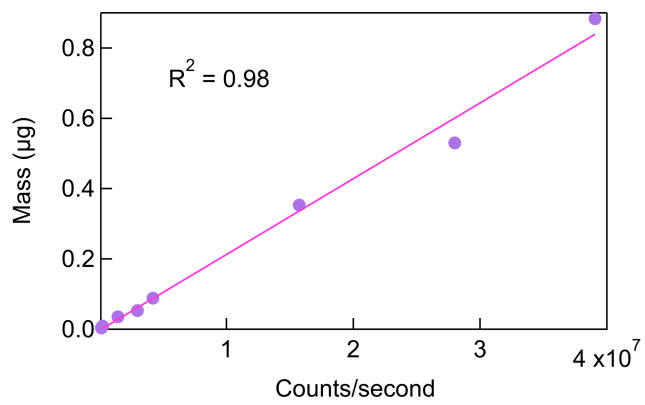

**Figure S2. Calibration of the FIGAERO-CIMS with pinic acid.**

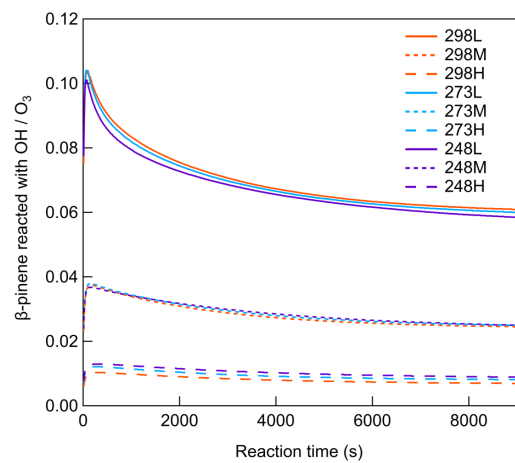

**Figure S3.** Ratio of the accumulated amount of  $\beta$ -pinene reacted with OH versus  $O_3$  for different  $[HO_2]/[RO_2]$  and temperatures (Exp. 298abc, 273abc, 248abc).

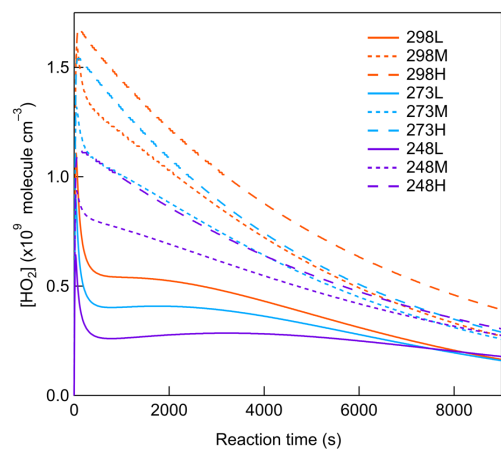

**Figure S4. Simulated  $\text{HO}_2$  concentration as a function of reaction time for different  $[\text{HO}_2]/[\text{RO}_2]$  and temperatures (Exp. 298abc, 273abc, 248abc).**

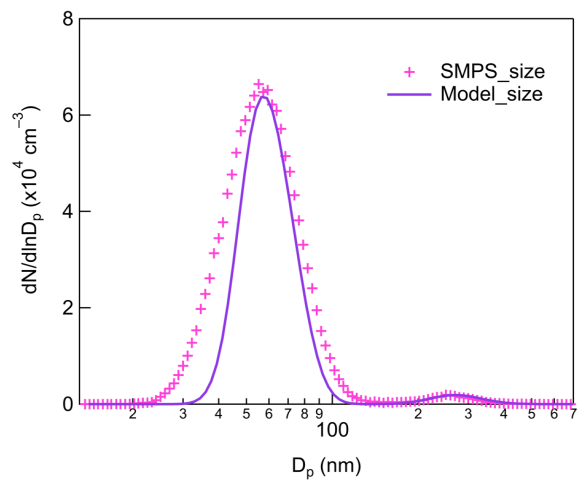

Figure S5. Particle size distribution from SMPS measurement and COSIMA model result at the end of reaction (Exp. 298a).

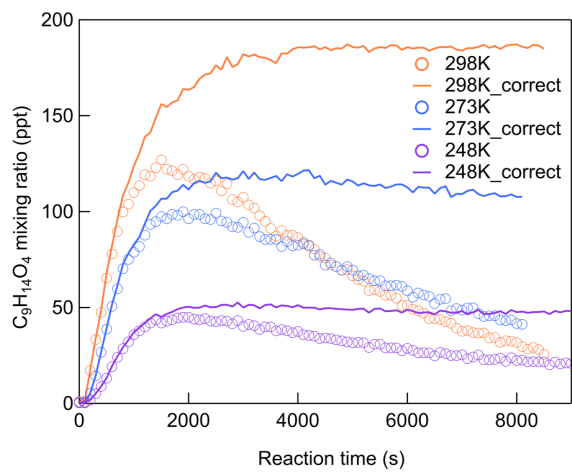

100

**Figure S6.** Time series of gas-phase  $C_9H_{14}O_4$  mixing ratio before and after wall loss correction at different temperatures (Exp. 298a, 273a, 248a).

105

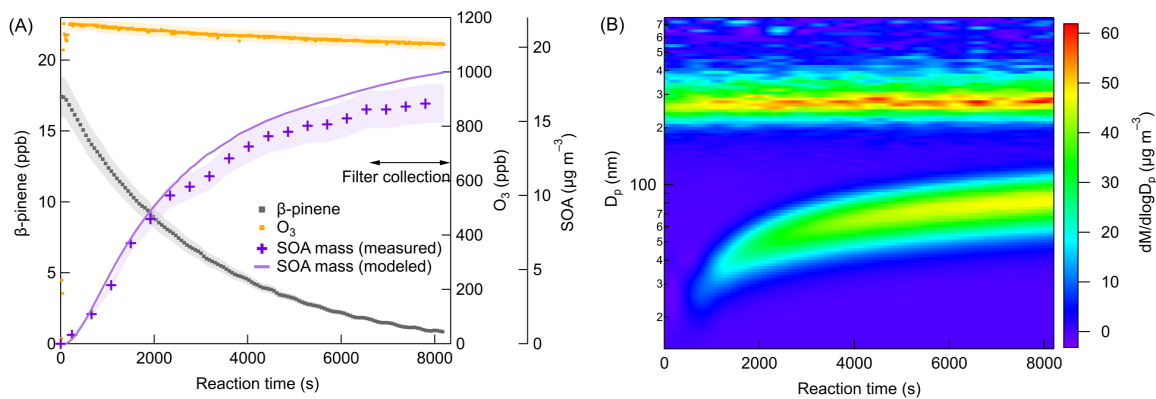

**Figure S7. Time series of (A)  $\beta$ -pinene mixing ratio,  $O_3$  mixing ratio, measured SOA mass concentrations, and simulated SOA mass concentrations after wall loss correction (B) Particle mass size distributions ( $dM/d\log D_p$ ) at 273 K (Exp. 273a).**



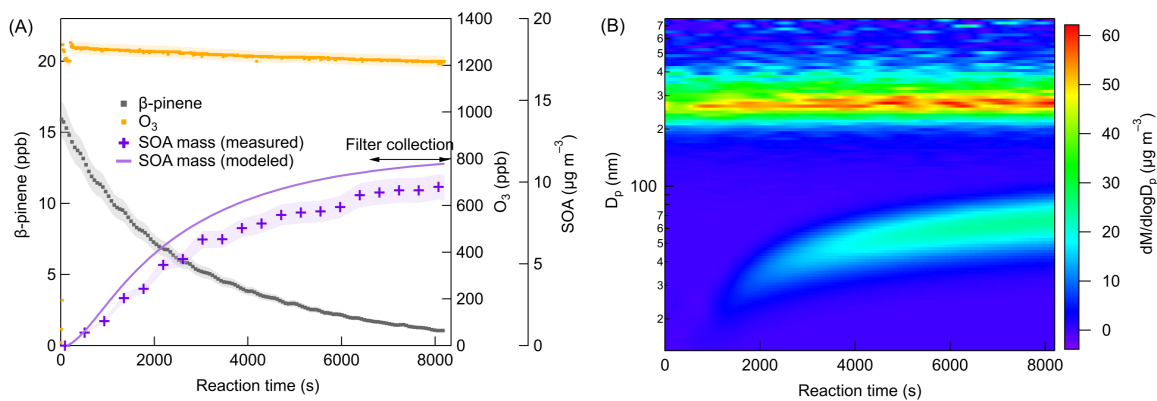

110 **Figure S8. Time series of (A)  $\beta$ -pinene mixing ratio,  $O_3$  mixing ratio, measured SOA mass concentrations, and simulated SOA mass concentrations after wall loss correction (B) Particle mass size distributions ( $dM/d\log D_p$ ) at 248 K (Exp. 248a).**

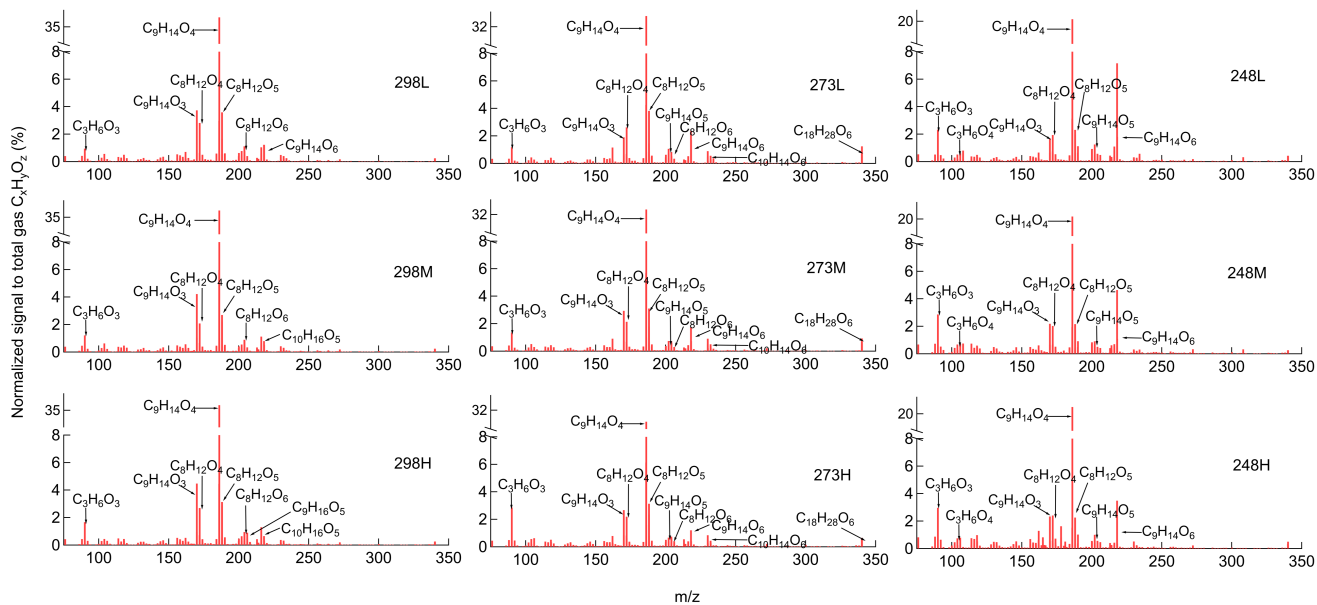

115 **Figure S9.** The averaged CIMS gas-phase mass spectra for all temperatures at different  $[\text{HO}_2]/[\text{RO}_2]$  (Signals are normalized to total gas  $\text{C}_x\text{H}_y\text{O}_z$ , Exp. 298abc, 273abc, 248abc).

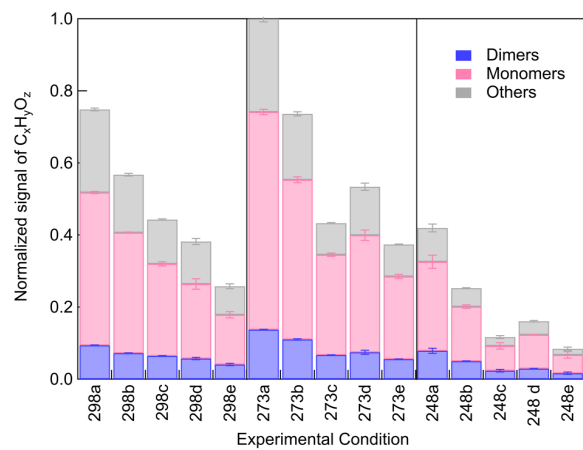

**Figure S10. Normalized signals of all particle-phase  $C_xH_yO_z$  compounds for different experimental conditions. The other species include  $C_{1-7}$ ,  $C_{11-15}$ , and  $C_{21-29}$  compounds with formulas of  $C_{1-7}H_{2-14}O_{2-9}$ ,  $C_{11-15}H_{12-28}O_{3-11}$ , and  $C_{21-29}H_{30-56}O_{5-12}$ .**

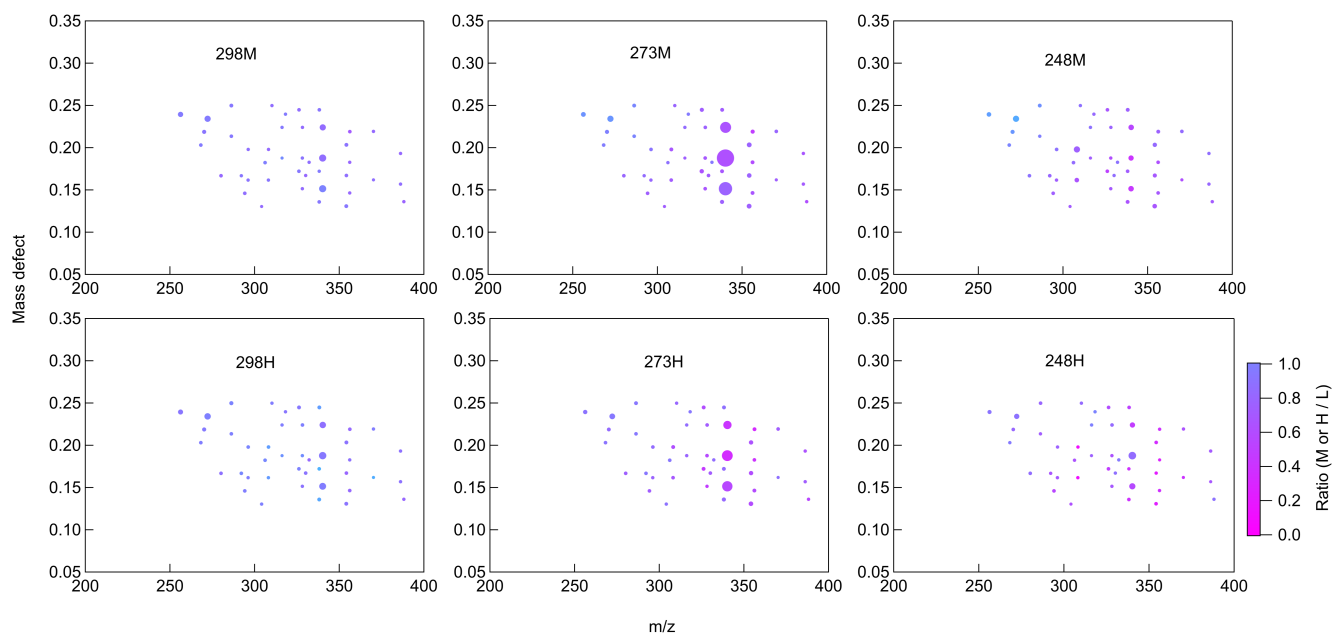

125

**Figure S11. Mass defect plots of gas-phase dimers at different temperatures. Markers are sized by the square root of their signals and colored by the ratio of signals at middle and high  $[\text{HO}_2]/[\text{RO}_2]$  versus signals at low  $[\text{HO}_2]/[\text{RO}_2]$  at each temperature (Exp. 298bc, 273bc, 248bc).**

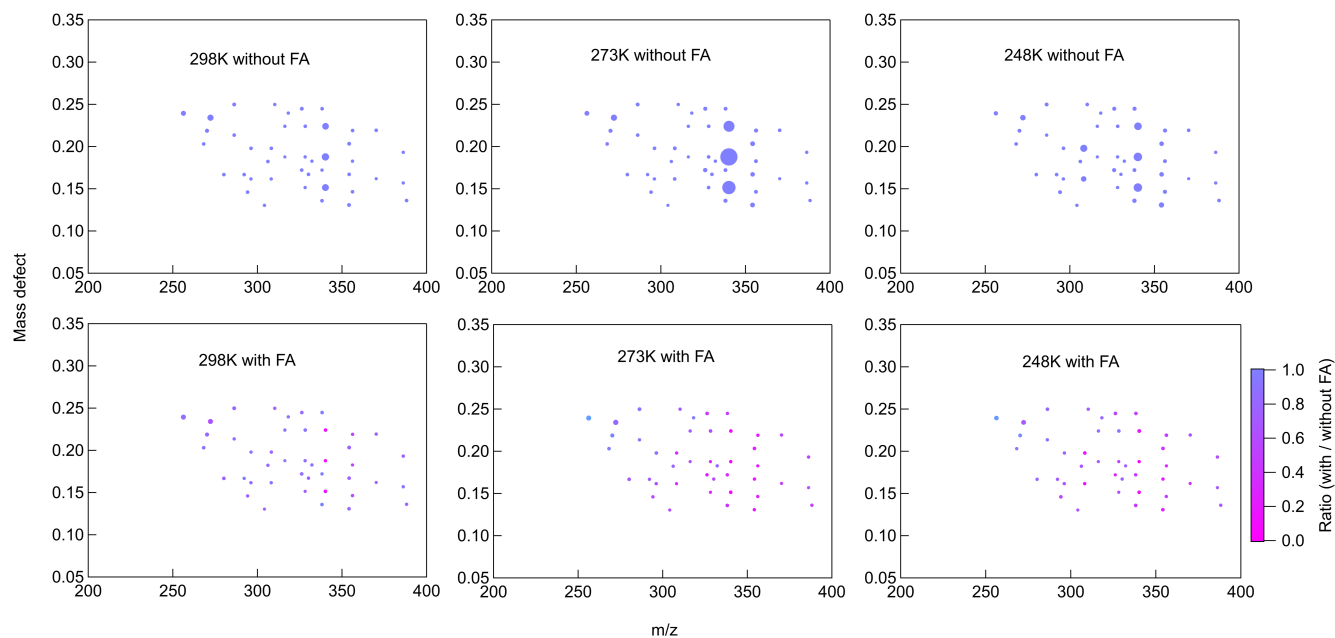

**Figure S12. Mass defect plots of gas-phase dimers at different temperatures at low  $[\text{HO}_2]/[\text{RO}_2]$ . Markers are sized by the square root of their signals and colored by the ratio of signals with or without FA versus signals without FA at each temperature (Exp. 298ad, 273ad, 248ad).**

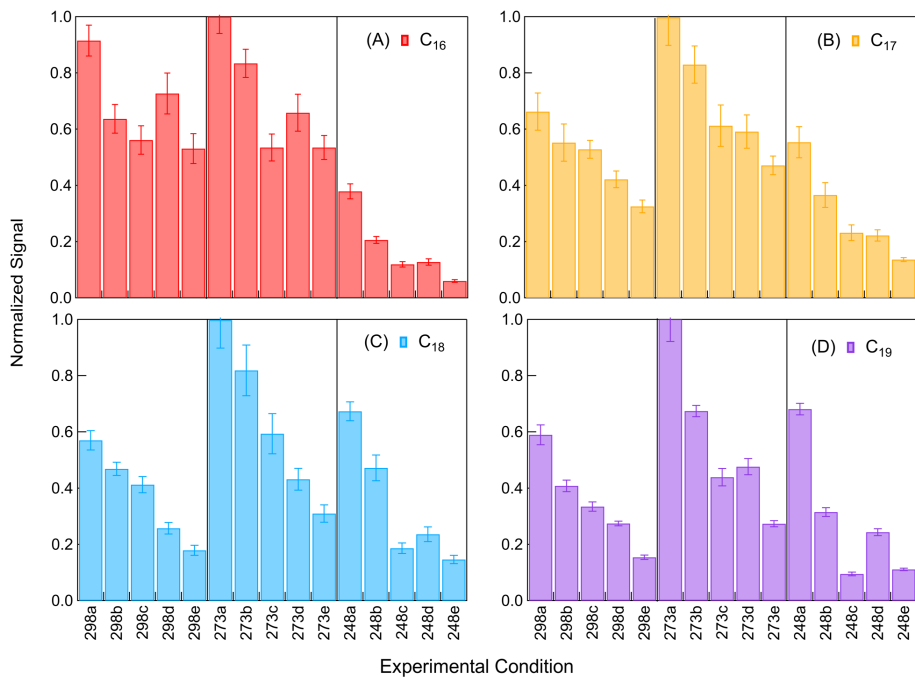

**Figure S13.** The particle-phase signals of (A) C<sub>16</sub> (B) C<sub>17</sub> (C) C<sub>18</sub> (D) C<sub>19</sub> dimers normalized to the peak intensity under different experimental conditions.

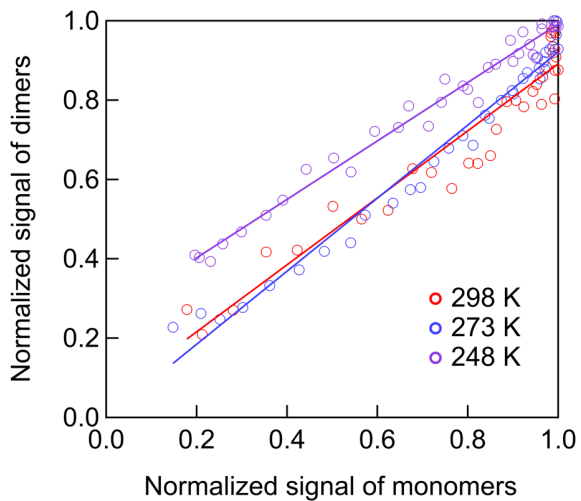

145 **Figure S14.** The correlation between gas-phase dimers and monomers at different temperatures (Exp. 298a, 273a, 248a). Solid lines are linear fit with  $R^2$  larger than 0.9.

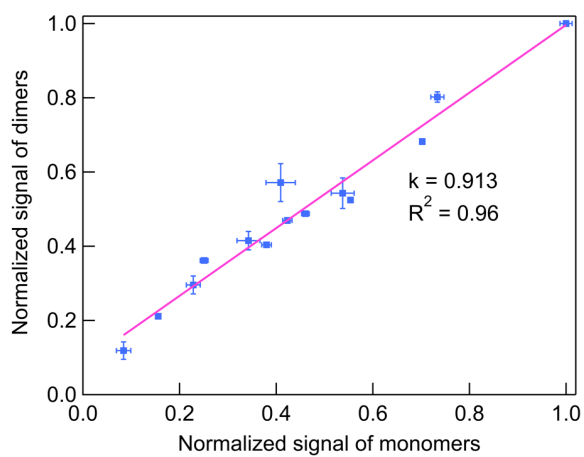

150 **Figure S15.** The correlation between particle-phase normalized signal of dimers with normalized signal of monomers under all conditions. The solid line shows a linear fit.



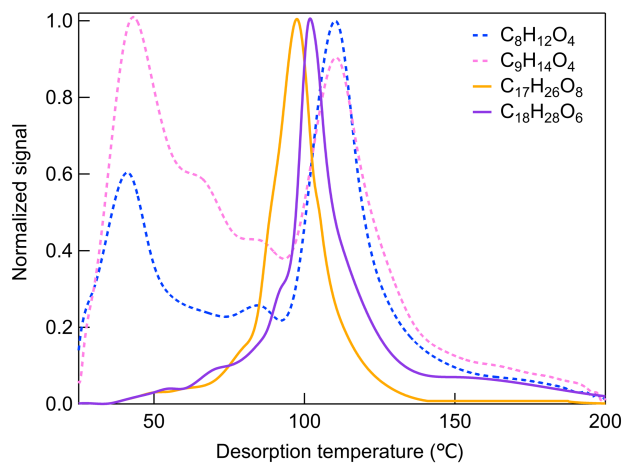

155

**Figure S16. Thermograms of abundant monomers ( $C_8H_{12}O_4$  and  $C_9H_{14}O_4$ ) and dimers ( $C_{17}H_{26}O_8$  and  $C_{18}H_{28}O_6$ ), i.e., the normalized signals versus desorption temperature.**

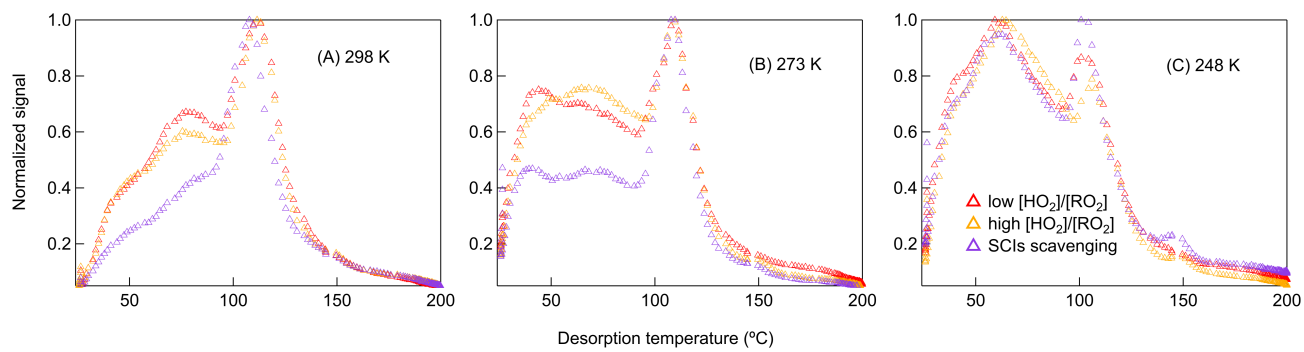

160

Figure S17. Sum thermograms at different temperatures with different  $[HO_2]/[RO_2]$  and SCIs conditions (Exp. 298acd, 273acd, 248acd).

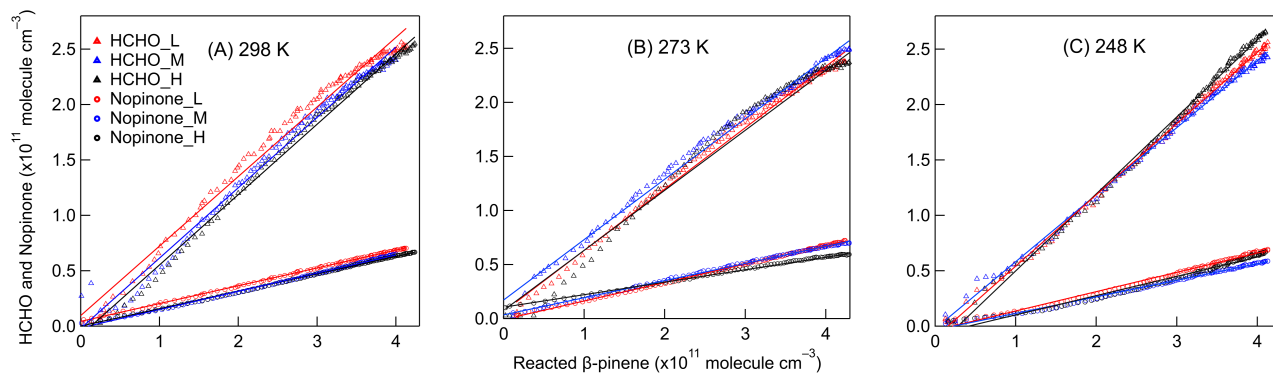

**Figure S18.** The formation of formaldehyde (HCHO) and nopinone as a function of  $\beta$ -pinene reacted at 298 K, 273 K, and 248 K for different  $[\text{HO}_2]/[\text{RO}_2]$  (Exp. 298abc, 273abc, 248abc). The lines represent linear fits and  $R^2$  values are larger than 0.95.

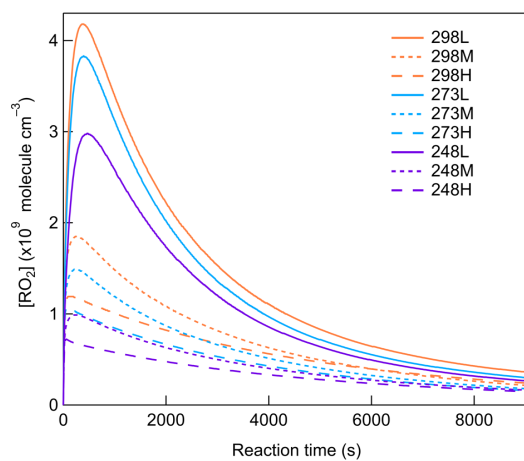

**Figure S19. Simulated RO<sub>2</sub> concentration as a function of reaction time for different [HO<sub>2</sub>]/[RO<sub>2</sub>] and temperatures (Exp. 298abc, 273abc, 248abc).**

175

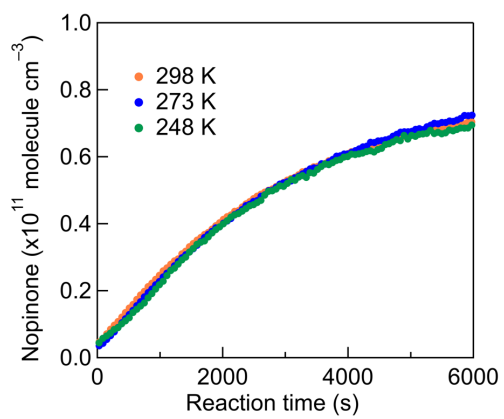

**Figure S20. Time series of nopinone concentration at different temperatures (Exp. 298a, 273a, 248a).**

180

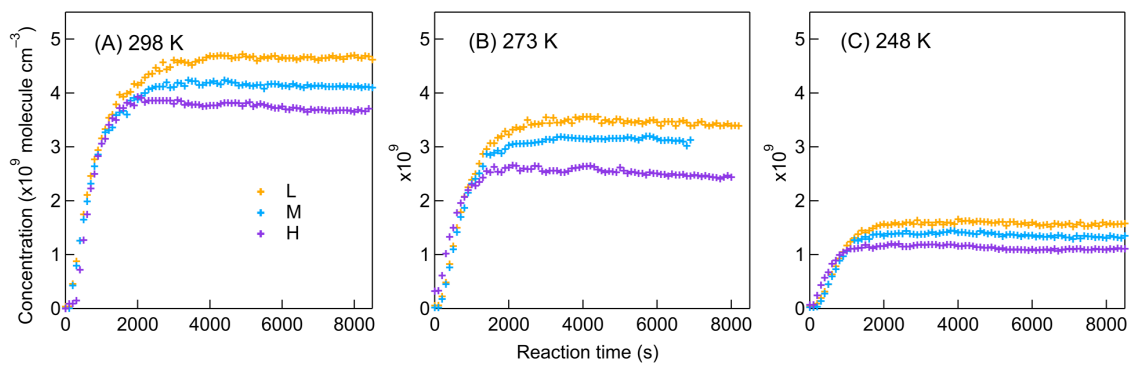

185 **Figure S21.** The impact of  $[HO_2]/[RO_2]$  on the gas-phase concentrations of  $C_9H_{14}O_4$  at (A) 298 K (B) 273 K (C) 248 K after wall loss correction (Exp. 298abc, 273abc, 248abc).
